# Supplementary material for: Verification and Bias Adjustment of ECMWF SEAS5 Seasonal Forecasts over Europe for Climate Service Applications
Source: MDPI journal article supplement (doi:10.3390/cli9120181), 2021-12-10
Supplement: s1 [file s1]

## Supplementary Material

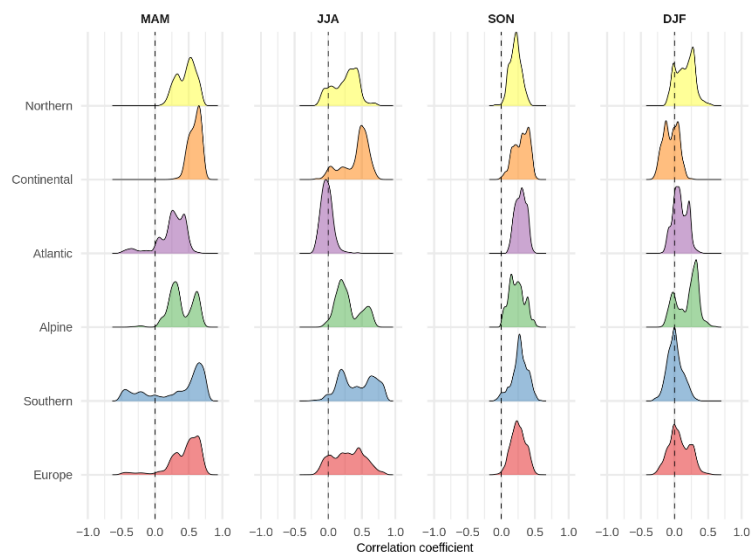

**Figure S1.** CORR distribution of unadjusted ECMWF SEAS5 ensemble seasonal forecasts of 2-m mean air temperature (one-month lead time) for European sub-regions and whole domain (bottom row). CORR was computed with respect to ERA5 over 1993 – 2016.

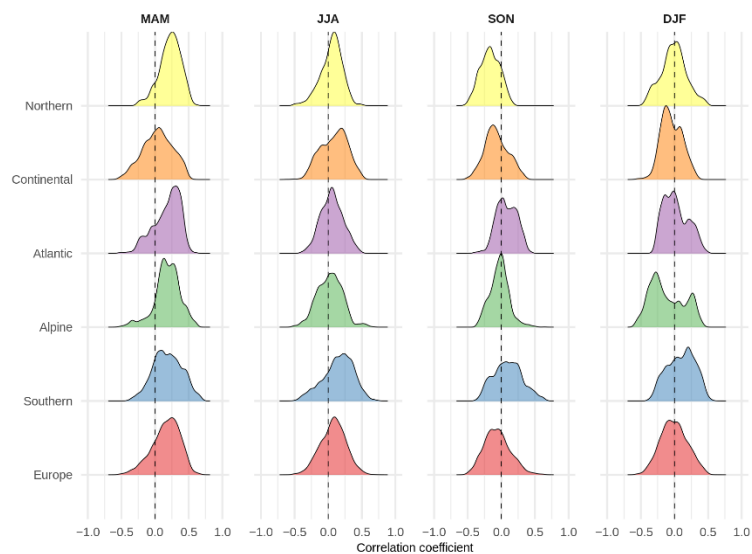

**Figure S2.** CORR distribution of unadjusted ECMWF SEAS5 ensemble seasonal forecasts of precipitation (one-month lead time) for European sub-regions and whole domain (bottom row). CORR was computed with respect to ERA5 over 1993 – 2016.

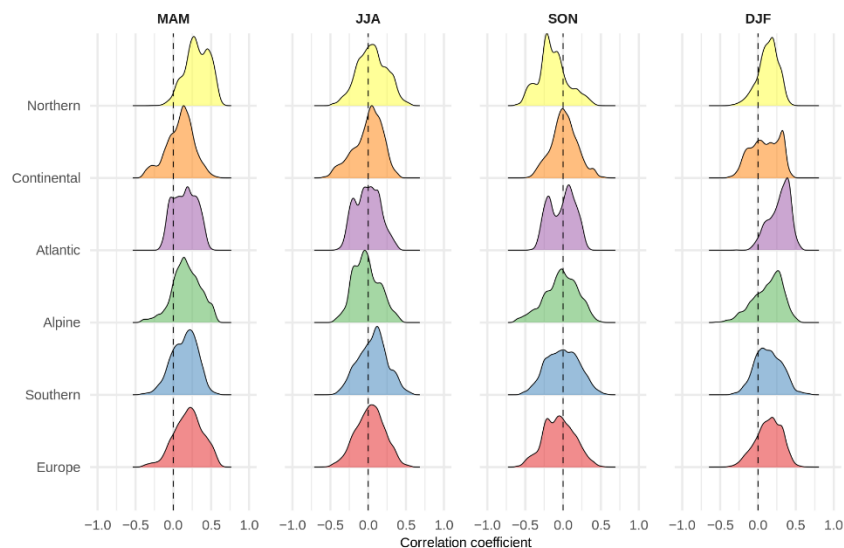

**Figure S3.** CORR distribution of unadjusted ECMWF SEAS5 ensemble seasonal forecasts of 10-m wind speed (one-month lead time) for European sub-regions and whole domain (bottom row). CORR was computed with respect to ERA5 over 1993 – 2016.

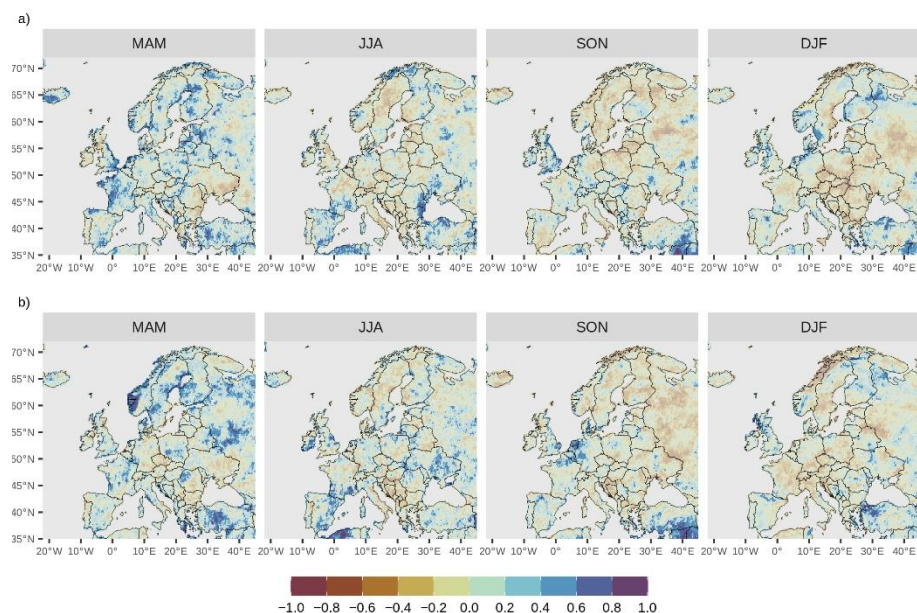

**Figure S4.** Spatial distribution of ROCSS for a) first and b) third tercile for unadjusted ECMWF SEAS5 ensemble seasonal forecasts of precipitation (one-month lead time) over Europe (land only) with respect to the climatological forecast over 1993 – 2016. Unshaded colors indicate grid cells with significant positive scores.

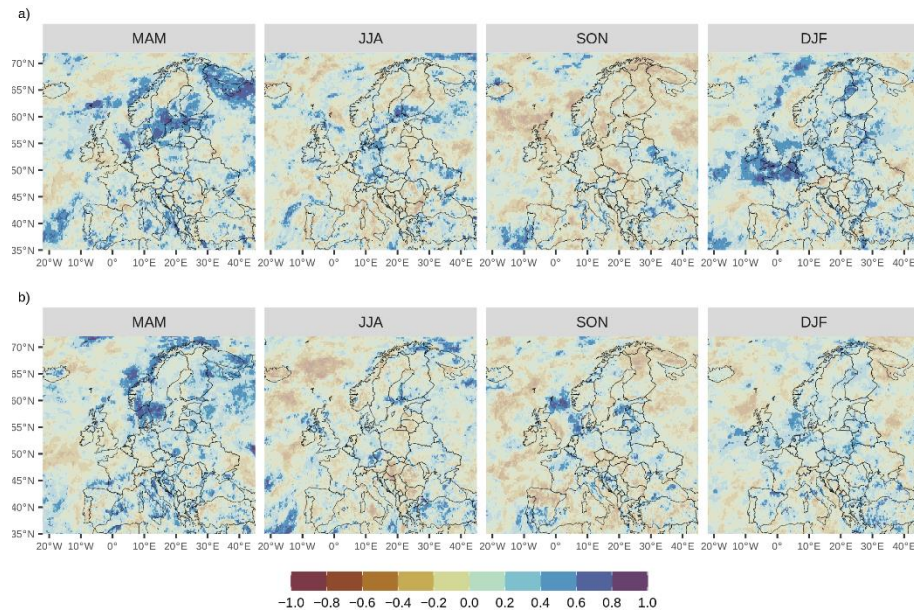

**Figure S5.** Spatial distribution of ROCSS for a) first and b) third tercile for unadjusted ECMWF SEAS5 ensemble seasonal forecasts of 10-m wind speed (one-month lead time) over Europe with respect to climatological forecast over 1993 – 2016. Unshaded colors indicate grid cells with significant positive scores.

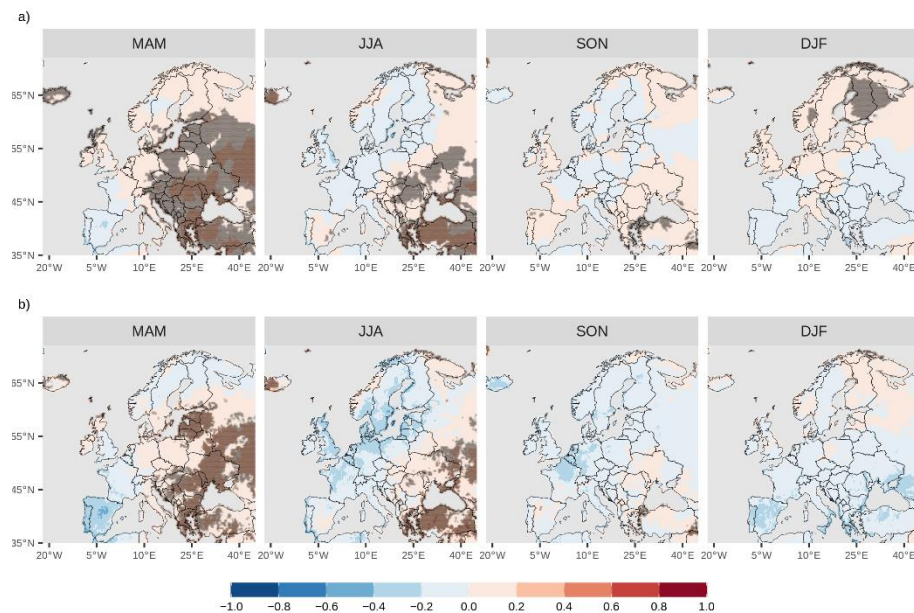

**Figure S6.** Spatial distribution of a) CRPSS and b) RPSS for calibrated ECMWF SEAS5 ensemble seasonal forecasts of 2-m mean air temperature (one-month lead time) over Europe (land only) with respect to the climatological forecast over 1993 – 2016. Points indicate grid cells with significant positive scores.



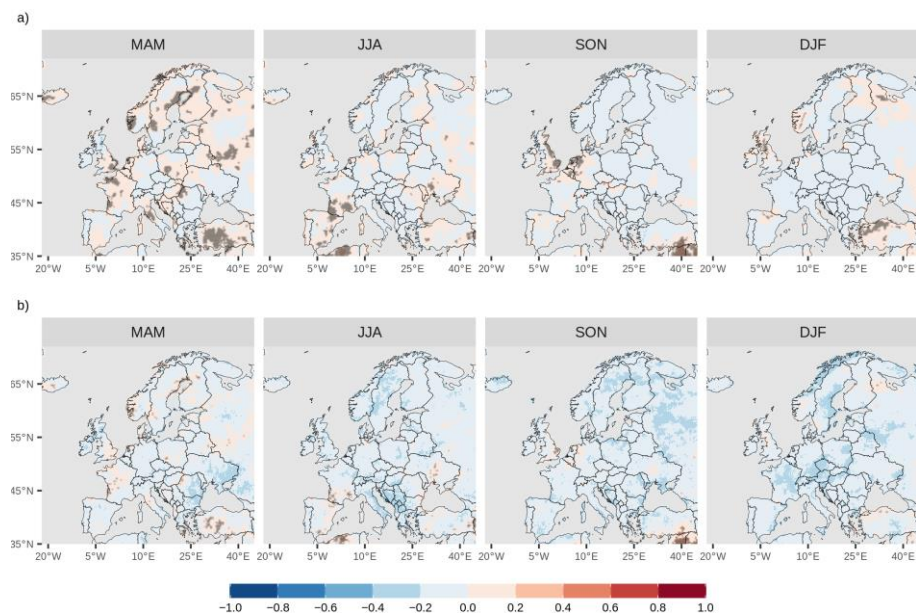

**Figure S7.** Spatial distribution of a) CRPSS and b) RPSS for calibrated ECMWF SEAS5 ensemble seasonal forecasts of precipitation (one-month lead time) over Europe (land only) with respect to the climatological forecast over 1993 – 2016. Points indicate grid cells with significant positive scores.

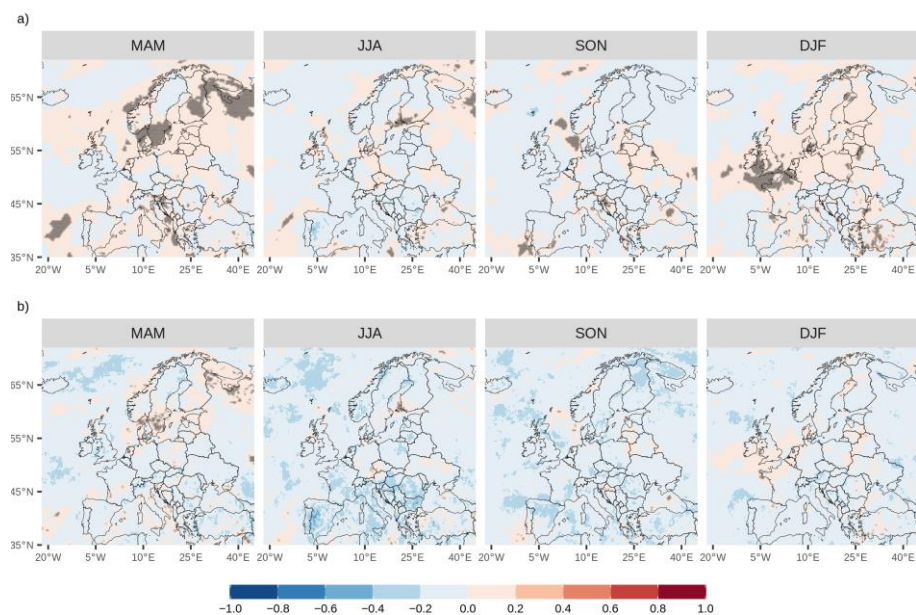

**Figure S8.** Spatial distribution of a) CRPSS and b) RPSS for calibrated ECMWF SEAS5 ensemble seasonal forecasts of 10-m wind speed (one-month lead time) over Europe with respect to climatological forecast over 1993 – 2016. Points indicate grid cells with significant positive scores.

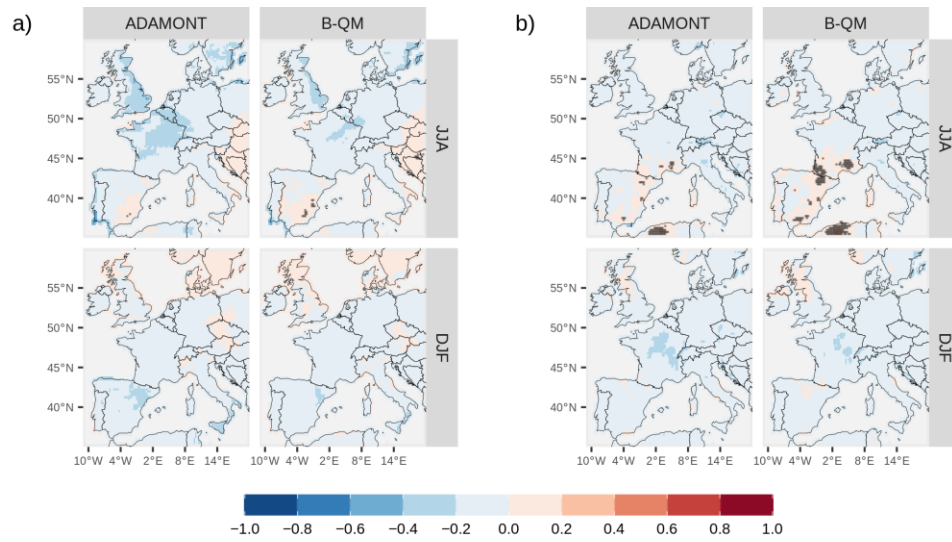

**Figure S9.** Spatial distribution of CRPSS for a) mean air temperature and b) precipitation in JJA and DJF for calibrated seasonal forecasts (one-month lead time) by ADAMONT and B-QM over 1993 – 2016 compared to the climatological forecast. Points indicate grid cells with significant positive scores.
